# Supplementary material for: A Genomic Perspective on the Conservation Status of the Endangered Nashville Crayfish (Faxonius shoupi)
Source: Research Square preprint supplement (doi:10.21203/rs.3.rs-393405/v1), 2021-04-28
Supplement: Supplementary file 1 [file 5d42e41d22452abce362c0d6.docx]

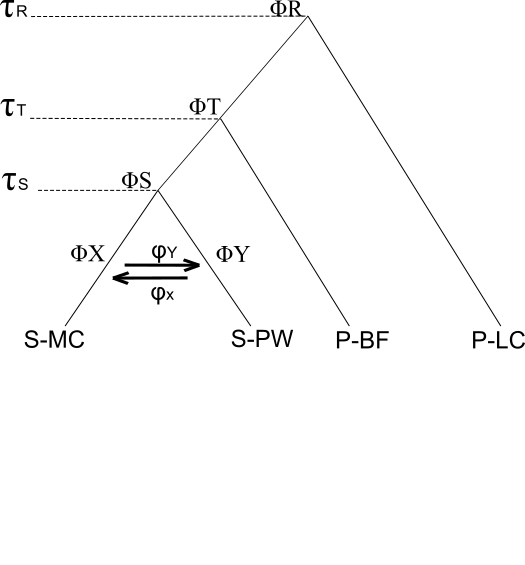


| **Model** | **T(S)** | **95% SD** | **T(T)** | **95% SD** | **T(R)** | **95% SD** | **phi_X** | **phi_Y** |
| --- | --- | --- | --- | --- | --- | --- | --- | --- |
| **Migration** | 65,957 | 32,827-100,399 | 85,112 | 54,163-117,766 | 264,850 | 170,941-410,204 | 0.5284 | 0.4630 |
| **No Migration** | 69,638 | 53,632-85,727 | 71,877 | 55,753-88,862 | 226,277 | 160,100-300,336 |  |  |

**Supplement 3**. A) Model M2 used for divergence time estimates using the Bayesian multispecies-coalescent-with-introgression (MSci) method as implemented in BPP (Flouri et al., 2018) and converted to absolute time in the BPPR statistical package (https://github.com/dosreislab/bppr). B) Posterior means of divergence time estimates (τi). for the model that includes bidirectional migration (M1) and for the model with no post-divergence migration (M2). Migration parameter estimates for model M2, ϕY and ϕX, indicate the proportion of gene flow from S 🡪Y and S 🡪X, respectively, (i.e. the proportion of gene flow from X🡪Y is 1- ϕY).
