# Supplementary material for: A Genomic Perspective on the Conservation Status of the Endangered Nashville Crayfish (Faxonius shoupi)
Source: Research Square preprint supplement (doi:10.21203/rs.3.rs-393405/v1), 2021-04-28
Supplement: Supplementary file 2 [file babac1decd9c1c71e2f14417.docx]

| **Dataset** | **Species - Populations** | **Retained Loci** | **Variant Sites** | **Samples per locus** |
| --- | --- | --- | --- | --- |
| p2r60 | *F. shoupi*, *F. placidus-* All | 1094 | 6545 | 105 |
| p2r60 | *F. shoupi* - All | 701 | 433 | 69 |
| p1r70 | *F. shoupi* - MC-U | 400 | 164 | 18 |
| p1r70 | *F. shoupi -* MC-M | 401 | 127 | 19 |
| p1r70 | *F. shoupi -* MC-L | 237 | 114 | 19 |
| p1r70 | *F. shoupi –* MC, PW | 174 | 100 | 20 |
| p1r70 | *F. placidus* – LC | 470 | 175 | 14 |
| p1r70 | *F. placidus* – BF | 469 | 136 | 13 |

**Supplement 1.** Description of SNP datasets used in analyses including the number of retained loci, the number of variant sites, and the average number of sampled individuals per locus.
